# Supplementary material for: Circulating miR-4763-3p Is a Novel Potential Biomarker Candidate for Human Adult Fulminant Myocarditis
Source: PubMed Central journal article supplement — Mol Ther Methods Clin Dev. 2020 May 12;17:1079–87. doi: 10.1016/j.omtm.2020.05.005 (PMC7248292; doi:10.1016/j.omtm.2020.05.005), 2020-05-12
Supplement: mmc1.pdf [file mmc1.pdf]

**OMTM, Volume 17**

## **Supplemental Information**

**Circulating miR-4763-3p Is a Novel Potential**

**Biomarker Candidate for Human Adult**

**Fulminant Myocarditis**

**Xiang Nie, Mengying He, Jin Wang, Peng Chen, Feng Wang, Jinsheng Lai, Chenze Li, Ting Yu, Houjuan Zuo, Guanglin Cui, Kun Miao, Jiangang Jiang, Dao Wen Wang, and Chen Chen**

**Supplementary Table S1. The clinical characteristics of FM patients in miRNA microarray analysis and qPCR analysis.**

| <b>Patients</b> | <b>Gender</b> | <b>Age (Year)</b> | <b>BP (mmHg)</b> | <b>HR (time/min)</b> | <b>Symptoms</b> | <b>Dyspnea</b> | <b>Shock</b> |
|-----------------|---------------|-------------------|------------------|----------------------|-----------------|----------------|--------------|
| 1               | Female        | 27                | 90/55            | 143                  | Chest distress  | -              | -            |
| 2               | Male          | 60                | 94/51            | 122                  | Weak            | -              | -            |
| 3               | Female        | 20                | 85/59            | 56                   | Chest distress  | -              | +            |
| 4               | Female        | 16                | 100/60           | 140                  | Fever           | +              | -            |
| 5               | Male          | 15                | 98/48            | 110                  | Fever, Weak     | -              | -            |
| 6               | Male          | 19                | 120/62           | 50                   | Chest distress  | -              | -            |
| 7               | Female        | 29                | 76/43            | 116                  | Fever, Weak     | -              | +            |
| 8               | Female        | 62                | 88/62            | 112                  | Chest pain      | -              | +            |
| 9               | Female        | 33                | 60/45            | 110                  | Chest distress  | +              | +            |
| 10              | Male          | 20                | 117/63           | 70                   | Chest pain      | -              | -            |
| 11              | Male          | 22                | 88/60            | 88                   | Chest distress  | -              | +            |
| 12              | Male          | 55                | 78/42            | 87                   | Fever           | +              | +            |
| 13              | Female        | 58                | 98/53            | 72                   | Chest distress  | -              | -            |
| 14              | Female        | 65                | 101/70           | 88                   | Stomachache     | -              | -            |
| 15              | Female        | 68                | 92/67            | 110                  | Chest pain      | -              | -            |
| 16              | Male          | 15                | 85/50            | 120                  | Fever, Weak     | -              | -            |
| 17              | Male          | 17                | 111/57           | 122                  | Chest pain      | -              | -            |
| 18              | Male          | 39                | 130/70           | 72                   | Fever           | -              | -            |
| 19              | Female        | 49                | 97/49            | 118                  | Chest pain      | -              | +            |
| 20              | Female        | 42                | 79/50            | 125                  | Fever           | -              | +            |

BP, blood pressure; HR, heart rate; “+” means positive; “-” means negative.

**Supplementary Table S2. The laboratory characteristics of FM patients in miRNA microarray analysis and qPCR analysis.**

| <b>Patients</b> | <b>Troponin (pg/ml)</b> | <b>BNP (pg/ml)</b> | <b>WBC (10<sup>9</sup>/L)</b> | <b>Neutrophil (10<sup>9</sup>/L)</b> | <b>ALT (U/L)</b> | <b>AST (U/L)</b> |
|-----------------|-------------------------|--------------------|-------------------------------|--------------------------------------|------------------|------------------|
| 1               | 39843.5                 | 12600              | 4.25                          | 3.15                                 | 530              | 430              |
| 2               | 38729.4                 | 30491              | 14.94                         | 12.96                                | 11               | 83               |
| 3               | 19159.8                 | 6033               | 11.36                         | 9.23                                 | 162              | 233              |
| 4               | 3369.3                  | 17426              | 12.25                         | 7.66                                 | 1155             | 1857             |
| 5               | 50000                   | 11806              | 16.48                         | 15.01                                | 76               | 232              |
| 6               | 50000                   | 878                | 10.78                         | 8.45                                 | 33               | 208              |
| 7               | 21186.5                 | 11715              | 11.82                         | 8.69                                 | 121              | 174              |
| 8               | 50000                   | -                  | 31.39                         | 29.76                                | 306              | 547              |
| 9               | 50000                   | 12289              | 7.02                          | 6.53                                 | 147              | 589              |
| 10              | 50000                   | 3910               | 9.38                          | 7.93                                 | 69               | 663              |
| 11              | 50000                   | 3910               | 10.5                          | 10.1                                 | 49               | 262              |
| 12              | 50000                   | 43482              | 14.2                          | 12.12                                | 2978             | 7000             |
| 13              | 38889.4                 | 8900               | 8.16                          | 7.62                                 | 61               | 181              |
| 14              | 1500                    | 15600              | 9.58                          | 7.49                                 | 113              | 103              |
| 15              | 9108.4                  | 10657              | 6.43                          | 5.23                                 | 75               | 69               |
| 16              | 23350                   | 10490              | 6.48                          | 5.43                                 | 121              | 243              |
| 17              | 28122.6                 | 529                | 10.27                         | 7.74                                 | 27               | 112              |
| 18              | 50000                   | 5484               | 7.9                           | 6.45                                 | 406              | 311              |
| 19              | 24445.5                 | 40665              | 8.26                          | 7.2                                  | 42               | 138              |
| 20              | 50000                   | 6618               | 10.02                         | 8.26                                 | 668              | 1257             |

BNP, natriuretic peptide; WBC, white blood cell; ALT, glutamic-pyruvic transaminase; AST, glutamic oxalacetic transaminase.

**Supplementary Table S3. The laboratory and virus serological characteristics of FM patients in miRNA microarray analysis and qPCR analysis.**

| <b>Patients</b> | <b>BUN (mmol/L)</b> | <b>SCR (<math>\mu</math>mol/L)</b> | <b>PT (s)</b> | <b>APTT (s)</b> | <b>CMV (IgG/IgM)</b> | <b>EBV (IgG/IgM)</b> | <b>CBV (IgG/IgM)</b> |
|-----------------|---------------------|------------------------------------|---------------|-----------------|----------------------|----------------------|----------------------|
| 1               | 9.04                | 59                                 | 15.3          | 49              | Not detected         | Not detected         | Not detected         |
| 2               | 6.31                | 99                                 | 17.9          | 53.5            | +/-                  | +/+                  | +/+                  |
| 3               | 7.37                | 73                                 | -             | -               | Not detected         | Not detected         | Not detected         |
| 4               | 8                   | 76                                 | 16.2          | 42.2            | +/-                  | +/-                  | +/-                  |
| 5               | 6.95                | 98                                 | 20.1          | >180            | Not detected         | Not detected         | Not detected         |
| 6               | 6                   | 103                                | 14.6          | 41.7            | Not detected         | Not detected         | Not detected         |
| 7               | 7.93                | 71                                 | 17.8          | 73.4            | Not detected         | Not detected         | Not detected         |
| 8               | 12.52               | 131                                | 18.6          | 100.8           | +/-                  | +/+                  | +/+                  |
| 9               | 5.27                | 45                                 | 18            | 180             | Not detected         | Not detected         | Not detected         |
| 10              | 1.38                | 73                                 | 14.1          | 33.9            | Not detected         | Not detected         | Not detected         |
| 11              | 7.38                | 91                                 | 15.4          | 105             | Not detected         | Not detected         | Not detected         |
| 12              | 19.78               | 248                                | 20.1          | 57              | Not detected         | Not detected         | Not detected         |
| 13              | 6.28                | 66                                 | 14.7          | 38.7            | Not detected         | Not detected         | Not detected         |
| 14              | 4.7                 | 84                                 | 14.5          | 30              | Not detected         | Not detected         | Not detected         |
| 15              | 7                   | 65                                 | 15.4          | 35              | Not detected         | Not detected         | Not detected         |
| 16              | 6.82                | 58                                 | 16.1          | 39.9            | +/-                  | Not detected         | Not detected         |
| 17              | 3.7                 | 63                                 | 13.5          | 37.2            | Not detected         | Not detected         | Not detected         |
| 18              | 7.3                 | 87                                 | 13.9          | 35.2            | +/-                  | +/-                  | +/-                  |
| 19              | 12.66               | 121                                | 13.6          | -               | Not detected         | Not detected         | Not detected         |
| 20              | 6.89                | 116                                | 15.4          | 36              | Not detected         | Not detected         | Not detected         |

BUN, blood urea nitrogen; SCR, serum creatinine; PT, prothrombin time; APTT, activated partial thromboplastin time; CMV, cytomegalovirus; EBV, Epstein-Barr virus; CBV, coxsackie B virus. “+” means positive; “-” means negative.

**Supplementary Table S4. The imaging examination characteristics of FM patients in miRNA microarray analysis and qPCR analysis.**

| <b>Patients</b> | <b>LVEF (%)</b> | <b>MRI</b>      |
|-----------------|-----------------|-----------------|
| 1               | 30              | edema;          |
| 2               | 40              | no detection    |
| 3               | 20              | necrosis        |
| 4               | 26              | necrosis        |
| 5               | 23              | edema; necrosis |
| 6               | 50              | no detection    |
| 7               | 18              | no detection    |
| 8               | 38              | necrosis        |
| 9               | 30              | necrosis        |
| 10              | 40              | edema; necrosis |
| 11              | 60              | necrosis        |
| 12              | 36              | edema; necrosis |
| 13              | 45              | necrosis        |
| 14              | 20              | necrosis        |
| 15              | 30              | necrosis;       |
| 16              | 25              | edema; necrosis |
| 17              | 53              | necrosis        |
| 18              | 45              | necrosis        |
| 19              | 44              | necrosis        |
| 20              | 52              | necrosis        |

LVEF, left ventricular ejection fraction; MRI, magnetic resonance imaging.

**Supplementary Table S5. The clinical characteristics of healthy controls in miRNA microarray analysis and qPCR analysis.**

| <b>No.</b> | <b>Gender</b> | <b>Age<br/>(Year)</b> | <b>BP<br/>(mmHg)</b> | <b>RR<br/>(time/min)</b> | <b>HR<br/>(time/min)</b> | <b>Symptoms</b> | <b>Troponin<br/>(pg/ml)</b> | <b>BNP<br/>(pg/ml)</b> |
|------------|---------------|-----------------------|----------------------|--------------------------|--------------------------|-----------------|-----------------------------|------------------------|
| 1          | Male          | 27                    | 112/76               | 25                       | 86                       | non             | normal                      | normal                 |
| 2          | Male          | 30                    | 120/70               | 24                       | 78                       | non             | normal                      | normal                 |
| 3          | Female        | 26                    | 109/64               | 22                       | 82                       | non             | normal                      | normal                 |
| 4          | Male          | 29                    | 111/80               | 22                       | 78                       | non             | normal                      | normal                 |
| 5          | Female        | 31                    | 106/60               | 23                       | 90                       | non             | normal                      | normal                 |
| 6          | Male          | 26                    | 111/69               | 22                       | 78                       | non             | normal                      | normal                 |
| 7          | Female        | 28                    | 118/78               | 26                       | 81                       | non             | normal                      | normal                 |
| 8          | Male          | 31                    | 109/68               | 25                       | 90                       | non             | normal                      | normal                 |
| 9          | Male          | 29                    | 110/78               | 24                       | 82                       | non             | normal                      | normal                 |
| 10         | Male          | 28                    | 120/80               | 29                       | 76                       | non             | normal                      | normal                 |

BP, blood pressure; RR, respiratory rate; HR, heart rate; BNP, natriuretic peptide.

**Supplementary Table S6. Expressions of changed miRNAs in plasma from FM patients detected by microarray.**

| miRNAs            | rep-1       |             | rep-2       |             | Change Consistency |
|-------------------|-------------|-------------|-------------|-------------|--------------------|
|                   | Fold Change | P-value     | Fold Change | P-value     |                    |
| hsa-miR-1292-3p   | 5.5665716   | 0.017400127 | 4.2915561   | 0.148434873 | Yes                |
| hsa-miR-1343-5p   | 2.1706765   | 0.013140548 | 1.5661065   | 0.123807629 | Yes                |
| hsa-miR-187-5p    | 3.8760104   | 0.023390019 | 1.9169418   | 0.021897065 | Yes                |
| hsa-miR-3663-3p   | 2.1079457   | 3.25035E-05 | 1.8542373   | 0.014886535 | Yes                |
| hsa-miR-3960      | 2.1290809   | 0.01088666  | 2.7086013   | 0.043127715 | Yes                |
| hsa-miR-4281      | 2.2751115   | 0.002312042 | 2.6016621   | 0.01765731  | Yes                |
| hsa-miR-4516      | 2.348358    | 0.003367775 | 1.746351    | 0.047434271 | Yes                |
| hsa-miR-4687-3p   | 2.2576347   | 0.046363172 | 3.195623    | 0.098491181 | Yes                |
| hsa-miR-4763-3p   | 2.2893713   | 0.003233119 | 2.4314457   | 0.043467693 | Yes                |
| hsa-miR-5096      | 8.0888842   | 0.027584302 | 2.2915277   | 0.492991283 | Yes                |
| hsa-miR-557       | 2.1574977   | 0.033326534 | 1.7082006   | 0.151700188 | Yes                |
| hsa-miR-6090      | 2.2540275   | 0.023014246 | 2.5249579   | 0.052865817 | Yes                |
| hsa-miR-6787-3p   | 7.7677508   | 0.020459967 | 4.9245955   | 0.109112661 | Yes                |
| hsa-miR-6850-5p   | 2.1530108   | 0.026485425 | 2.2993003   | 0.060326852 | Yes                |
| hsa-miR-762       | 2.8516224   | 0.009787574 | 3.0108339   | 0.082569859 | Yes                |
| hsa-miR-1207-5p   | 1.8239762   | 0.012423968 | 2.1650684   | 0.036489617 | Yes                |
| hsa-miR-2861      | 1.6773418   | 0.073602858 | 2.1877244   | 0.035195411 | Yes                |
| hsa-miR-3615      | 5.1474729   | 0.121622138 | 11.2102729  | 0.036488215 | Yes                |
| hsa-miR-5585-3p   | 8.0514333   | 0.082807466 | 30.8210635  | 0.03420369  | Yes                |
| hsa-miR-6089      | 1.7274137   | 0.047136898 | 2.2563471   | 0.019368792 | Yes                |
| hsa-miR-6800-5p   | 1.74665     | 0.004385088 | 2.0700685   | 0.019441732 | Yes                |
| hsa-miR-6869-5p   | 2.1820196   | 0.073793449 | 3.4925469   | 0.009152809 | Yes                |
| hsa-miR-103a-2-5p | 0.36537     | 0.270931903 | 0.070726    | 0.012269165 | Yes                |

|                 |          |             |          |             |     |
|-----------------|----------|-------------|----------|-------------|-----|
| hsa-miR-151a-3p | 0.026912 | 0.033212323 | 0.003523 | 8.36429E-05 | Yes |
| hsa-miR-330-3p  | 0.157352 | 0.105014502 | 0.056014 | 0.013896628 | Yes |
| hsa-miR-519d-3p | 0.201808 | 0.104146701 | 0.075466 | 0.026640582 | Yes |
| hsa-miR-126-5p  | 0.131086 | 0.048208162 | 0.215016 | 0.186527183 | Yes |
| hsa-miR-223-3p  | 0.111126 | 0.00579297  | 0.10536  | 0.078707711 | Yes |
| hsa-miR-451a    | 0.02825  | 0.006711307 | 0.015981 | 0.057119657 | Yes |
| hsa-miR-486-5p  | 0.231677 | 0.006260743 | 0.252604 | 0.076834895 | Yes |

Fold Change > 2.0 with P-value < 0.05 or Fold Change < 0.5 with P-value < 0.05 were considered statistically significant for up- or down-regulated miRNAs respectively.

**Supplementary Table S7. The clinical characteristics of MI patients in miRNA microarray analysis.**

| <b>Patients</b> | <b>Gender</b> | <b>Age (Year)</b> | <b>BP (mmHg)</b> | <b>Symptoms</b> | <b>LVEF (%)</b> | <b>Troponin (pg/ml)</b> | <b>BNP (pg/ml)</b> |
|-----------------|---------------|-------------------|------------------|-----------------|-----------------|-------------------------|--------------------|
| 1               | Female        | 30                | 100/66           | Chest Pain      | 69              | 2347.90                 | 1210               |
| 2               | Female        | 36                | 110/62           | Chest Pain      | 52              | 3509.6                  | 3367               |
| 3               | Male          | 36                | 98/60            | Chest Pain      | 62              | 3509.6                  | 2231               |
| 4               | Male          | 38                | 100/60           | Chest Pain      | 66              | 4343                    | 1899               |
| 5               | Male          | 38                | 92/52            | Chest Pain      | 63              | 3427.53                 | 2176               |

BP, blood pressure; LVEF, left ventricular ejection fraction; BNP, natriuretic peptide.



**Supplementary Table S8. The treatment strategy for each FM patient.**

| Patients | IABP | ECMO | CRRT | Anti-virus | Glucocorticoid | Dopamine | Survival |
|----------|------|------|------|------------|----------------|----------|----------|
| 1        | +    | -    | +    | +          | +              | -        | Yes      |
| 2        | +    | -    | +    | +          | +              | +        | Yes      |
| 3        | +    | -    | +    | +          | +              | -        | Yes      |
| 4        | +    | -    | +    | +          | +              | -        | Yes      |
| 5        | +    | +    | +    | +          | +              | -        | Yes      |
| 6        | +    | -    | +    | +          | +              | -        | Yes      |
| 7        | +    | +    | +    | +          | +              | +        | Yes      |
| 8        | +    | -    | +    | +          | +              | +        | Yes      |
| 9        | +    | +    | +    | +          | +              | +        | No       |
| 10       | +    | -    | -    | +          | +              | -        | Yes      |
| 11       | +    | -    | +    | +          | +              | +        | Yes      |
| 12       | +    | +    | +    | +          | +              | +        | Yes      |
| 13       | +    | -    | +    | +          | +              | -        | Yes      |
| 14       | +    | -    | -    | +          | +              | +        | Yes      |
| 15       | +    | -    | +    | +          | +              | -        | Yes      |
| 16       | +    | -    | +    | +          | +              | +        | Yes      |
| 17       | +    | -    | +    | +          | +              | -        | Yes      |
| 18       | +    | -    | +    | +          | +              | +        | Yes      |
| 19       | +    | -    | +    | +          | +              | -        | Yes      |
| 20       | +    | +    | +    | +          | +              | +        | Yes      |

IABP, intra-aortic balloon pump; ECMO, extracorporeal membrane oxygenation; CRRT, continuous renal replacement therapy. “+” means Yes; “-” means No.

**Supplementary Table S9. Expression of miRNAs in plasma from FM patients with treatment detected by microarray.**

| Name        | Fold Change | P-value | FDR  |
|-------------|-------------|---------|------|
| miR-4281    | 1.58        | 0.053   | 0.46 |
| miR-4763-3p | 1.06        | 0.73    | 0.89 |
| miR-151a-3p | 0.004       | <0.001  | 0.13 |

FDR: false discovery rate.
